# Supplementary material for: The Effect of Sleeve Gastrectomy on Oxidative Stress in Obesity
Source: PubMed Central journal article supplement (PMC7344505; doi:10.3390/biomedicines8060168), 2020-06-19
Supplement: biomedicines-08-00168-s001.pdf [file biomedicines-08-00168-s001.pdf]

### Correlation between weight and the blood concentration of CP\*

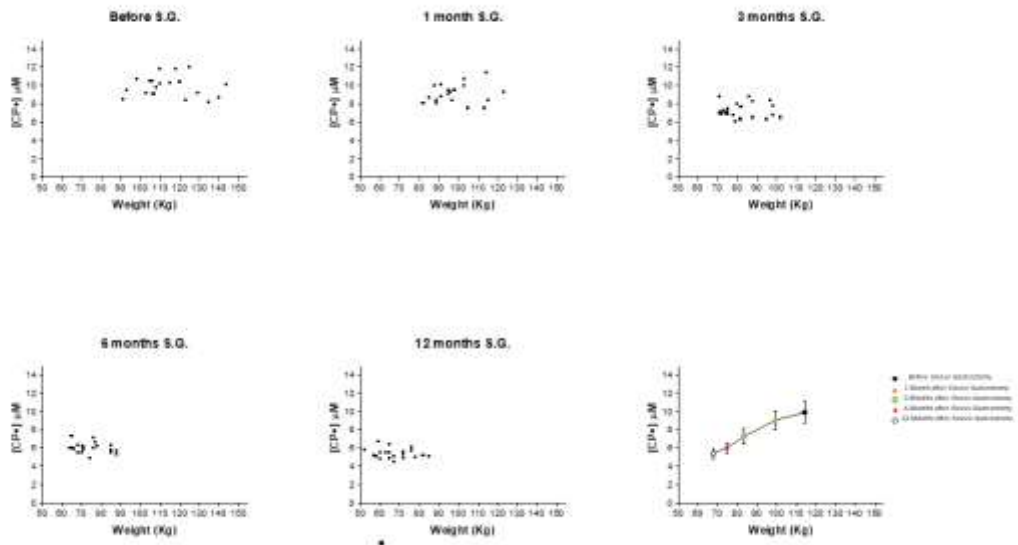

The correlation analyses Weight/CP at each time point, following olive germectomy (S.G.) showed no statistically significant results for each time-point, while the correlation Weight/CP resulted statistically significant (correlation  $p < 0.0013$ ;  $C: 0.8466$  to  $0.8985$ ), considering the time-course of the mean values of Weight/CP during the follow-up (last figure).
